# Supplementary material for: Shedding light on the aqueous synthesis of silicon nanoparticles by reduction of silanes with citrates
Source: Royal Society of Chemistry journal article supplement (doi:10.1039/c9fd00127a), 2020-01-01
Supplement: c9fd00127a1.pdf [file c9fd00127a1.pdf]

Supporting Information

## Shedding light on the aqueous synthesis of silicon nanoparticles by reduction of silanes with citrates

John L. Z. Ddunga<sup>a,b</sup>, Simone Silvestrini<sup>a</sup>, Alessandra Tassoni<sup>a</sup> and Luisa De Cola<sup>a,b\*</sup>

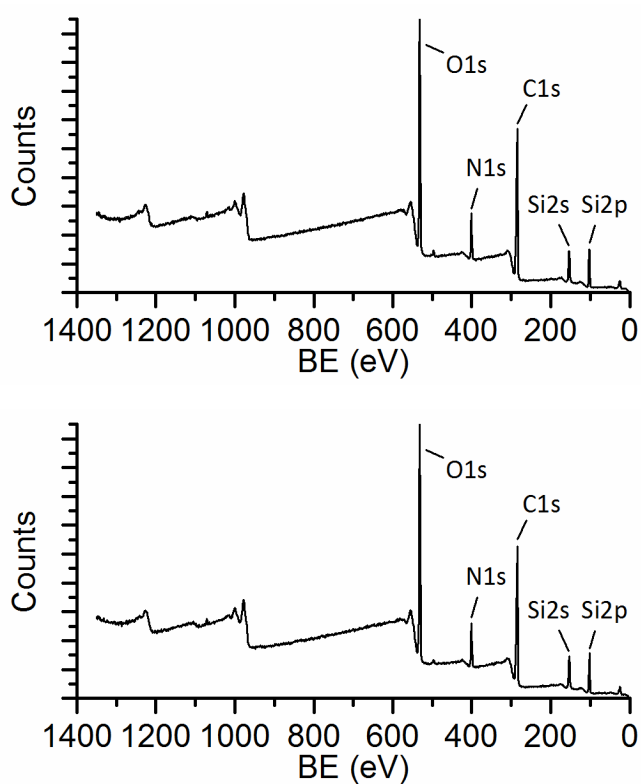

**Figure S1.** XPS survey scans of HT-CS (top) and MW-CS (bottom)

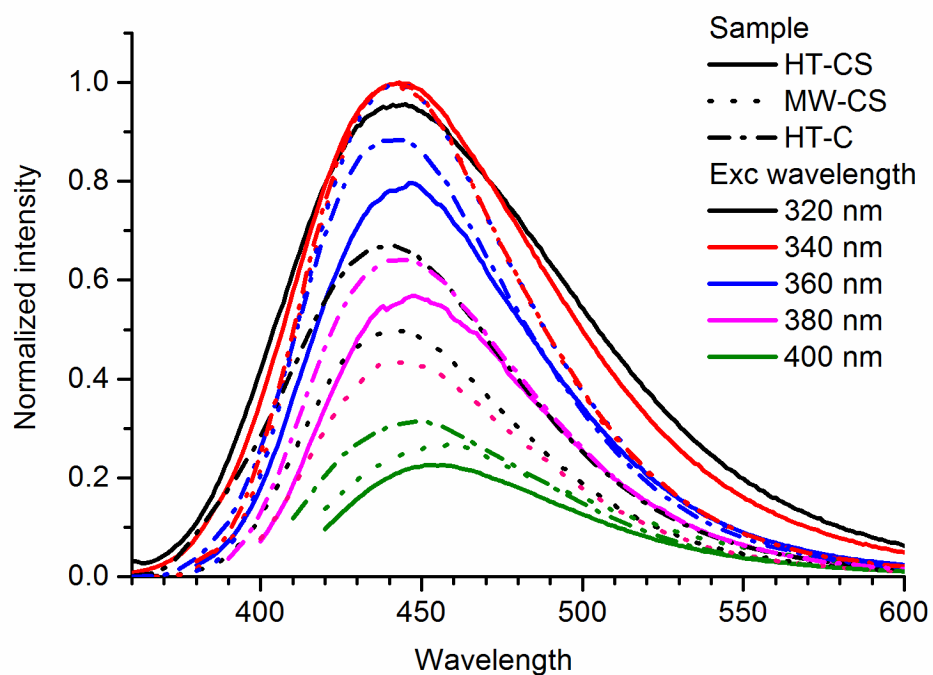

**Figure S2.** Excitation-dependent photoluminescence emission of samples

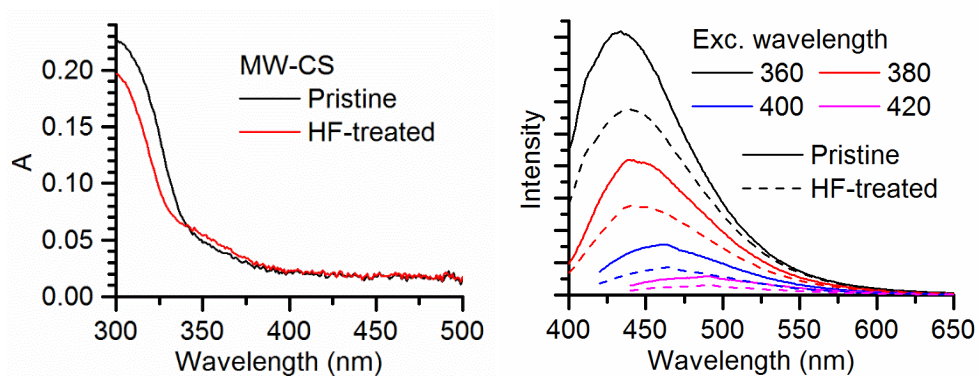

**Figure S3.** UV-Vis and photoluminescence spectra of MW-CS prior and post HF-etching
